# Supplementary material
Source: PubMed Central journal article supplement (PMC4382673)
Supplement: NIHMS675813-supplement-01.pdf [file NIHMS675813-supplement-01.pdf]

## Appendix A

[Click here to download Supplemental Data File \(.doc, .tif, pdf, etc.\): Appendix A.doc](#)

## Appendix B

[Click here to download Supplemental Data File \(.doc, .tif, pdf, etc.\): Appendix B.doc](#)

## Appendix C

[Click here to download Supplemental Data File \(.doc, .tif, pdf, etc.\): Appendix C.doc](#)
